# Supplementary material
Source: ML conference proceedings conference paper supplement (https://openreview.net/forum?id=5dHQyEcYDgA)
Supplement: supplementary_material [file attachment]

## A Appendix

**Theorem 1:** The marginal instance contribution from an Additive MIL model,  $g(x_i)$  is proportional to the Shapley value of that instance,  $\phi_i$ .

$$g(x_i) \propto \phi_i(V, x) = \sum_{S \subseteq F \setminus i} \frac{|S|!(|F| - |S| - 1)!}{|F|!} V_{S \cup i}(x_{S \cup i}) - V_S(x_S) \quad (7)$$

*Proof:* The interpretation for the value function  $V_S$  is taken from [28] where it's defined as the expected value of the model given a specific input set  $x_S^*$ .

$$V_S(x_S) = \mathbb{E}[g(x)|x_S = x_S^*] \quad (8)$$

Since the conditional expectation is for the case where only the set  $S$  is known, rewriting the equation in the form of integrals and breaking it down by set  $S$  and its complement  $\bar{S}$  gives:

$$V_S(x_S) = \int g(x) p(x_{\bar{S}} | x_S = x_S^*) dx_{\bar{S}} \quad (9)$$

$$= \int \left[ \left( \sum_{j \in S} g(x_j^*) \right) + \left( \sum_{j \in \bar{S}} g(x_j) \right) \right] p(x_{\bar{S}} | x_S = x_S^*) dx_{\bar{S}} \quad (10)$$

$$= \int \sum_{j \in S} g(x_j^*) p(x_{\bar{S}} | x_S = x_S^*) dx_{\bar{S}} + \int \left( \sum_{j \in \bar{S}} g(x_j) \right) p(x_{\bar{S}} | x_S = x_S^*) dx_{\bar{S}} \quad (11)$$

$$= \sum_{j \in S} g(x_j^*) \int p(x_{\bar{S}} | x_S = x_S^*) dx_{\bar{S}} + \sum_{j \in \bar{S}} \mathbb{E}[g(x_j)] \quad (12)$$

$$= \sum_{j \in S} g(x_j^*) + \sum_{j \in \bar{S}} \mathbb{E}[g(x_j)] \quad (13)$$

Equation 10 uses the model definition from equation 5 to express the function  $g$  into its linearly additive components over all instances which are either in set  $S$  or in  $\bar{S}$ . Similarly, we can write the value function when the  $i^{th}$  index is included in  $S$  by removing it from set  $\bar{S}$  and adding it to  $S$ :

$$V_{S \cup i}(x_{S \cup i}) = V_S(x_S) + g(x_i^*) - \mathbb{E}[g(x_i)] \quad (14)$$

$$V_{S \cup i}(x_{S \cup i}) - V_S(x_S) = g(x_i^*) - \mathbb{E}[g(x_i)] \quad (15)$$

Since the second term here is the expected value of the model output, we can put this back in equation 7 to get an equivalence between the Shapley value and the instance contribution from an Additive MIL model.

$$\phi_i(V, x) \propto g(x_i)$$
